# Supplementary material
Source: Royal Society of Chemistry journal article supplement (doi:10.1039/d5ma01380a)
Supplement: d5ma01380a1.pdf [file d5ma01380a1.pdf]

## **Integrating PtCo nanoparticles in graphitic carbon for rechargeable zinc-air batteries**

M. Jareer<sup>a</sup>, Ana Maria Borges Honorato<sup>a</sup>, Mohmmad Khalid<sup>a</sup>, Mathew K. Francis<sup>a</sup>, Safa sanaz<sup>b</sup>, Samaneh Shahgaldi<sup>a\*</sup>

[Samaneh.shahgaldi@uqtr.ca](mailto:Samaneh.shahgaldi@uqtr.ca)

<sup>a</sup>Hydrogen Research Institute / Institut d'Innovations en Écomatériaux, Écoproduits et Écoénergies. Université du Québec à Trois-Rivières, 3351 boul. des forges, Trois-Rivières (Québec) G8Z 4M3, Canada

<sup>b</sup>CÉPROCQ of Maisonneuve College, 6220 rue Sherbrooke Est, Montréal (QC) H1N 1C1

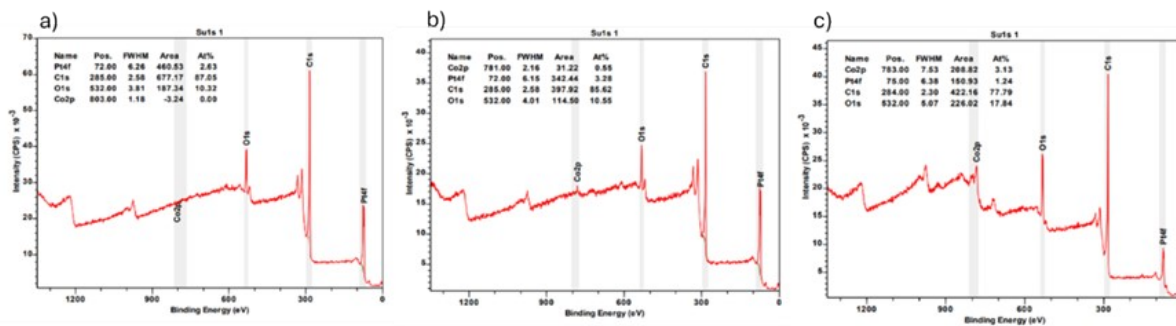

**Figure S1** The XPS survey spectra of a) Pt/Kb, b) PtCo/Kb, and c) Pt<sub>0.5</sub>Co/Kb.

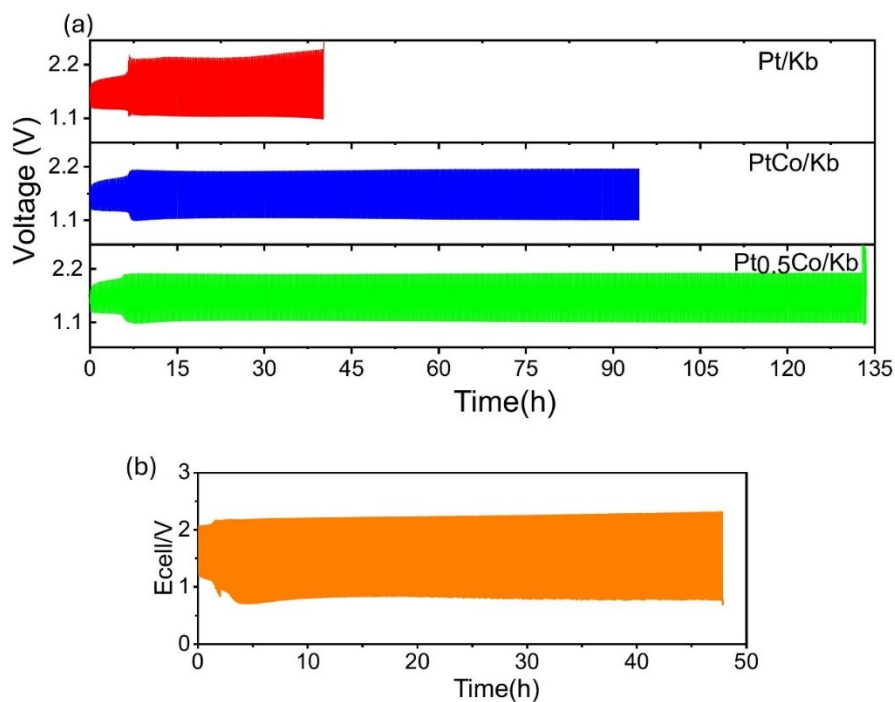

**Figure S2** (a) GCD performance at low-current testing of 2 mAcm<sup>-2</sup>, 10 min cycles of Pt/Kb, PtCo/Kb, Pt<sub>0.5</sub>Co/Kb. (b) GCD performance at 10 mAcm<sup>-2</sup> of Pt<sub>0.5</sub>Co/Kb with 10 minutes each cycle.

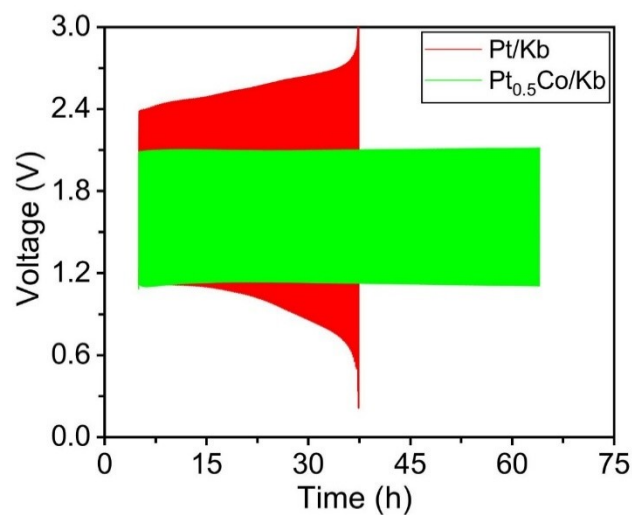

**Figure S3** GCD performance after rate capability test at 2 mAcm<sup>-2</sup> and 10-minute cycles each.

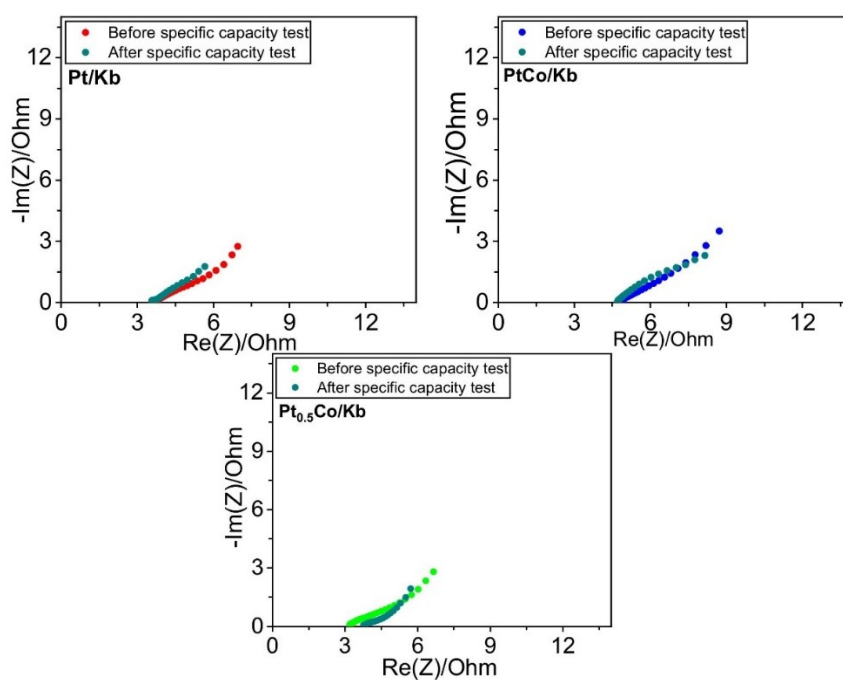

**Figure S4** EIS analysis of different catalysts before and after specific capacity tests.

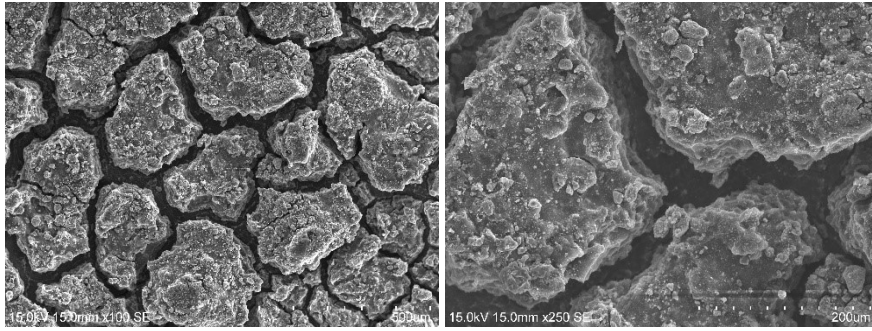

**Figure S5** Post-mortem SEM images of cycled  $\text{Pt}_{0.5}\text{Co}/\text{Kb}$  cell.
